# Supplementary figures and images for: GPC2 antibody–drug conjugate reprograms the neuroblastoma immune milieu to enhance macrophage-driven therapies
Source: HighWire-hosted journal article supplement (doi:10.1136/jitc-2022-004704), 2022-12-01

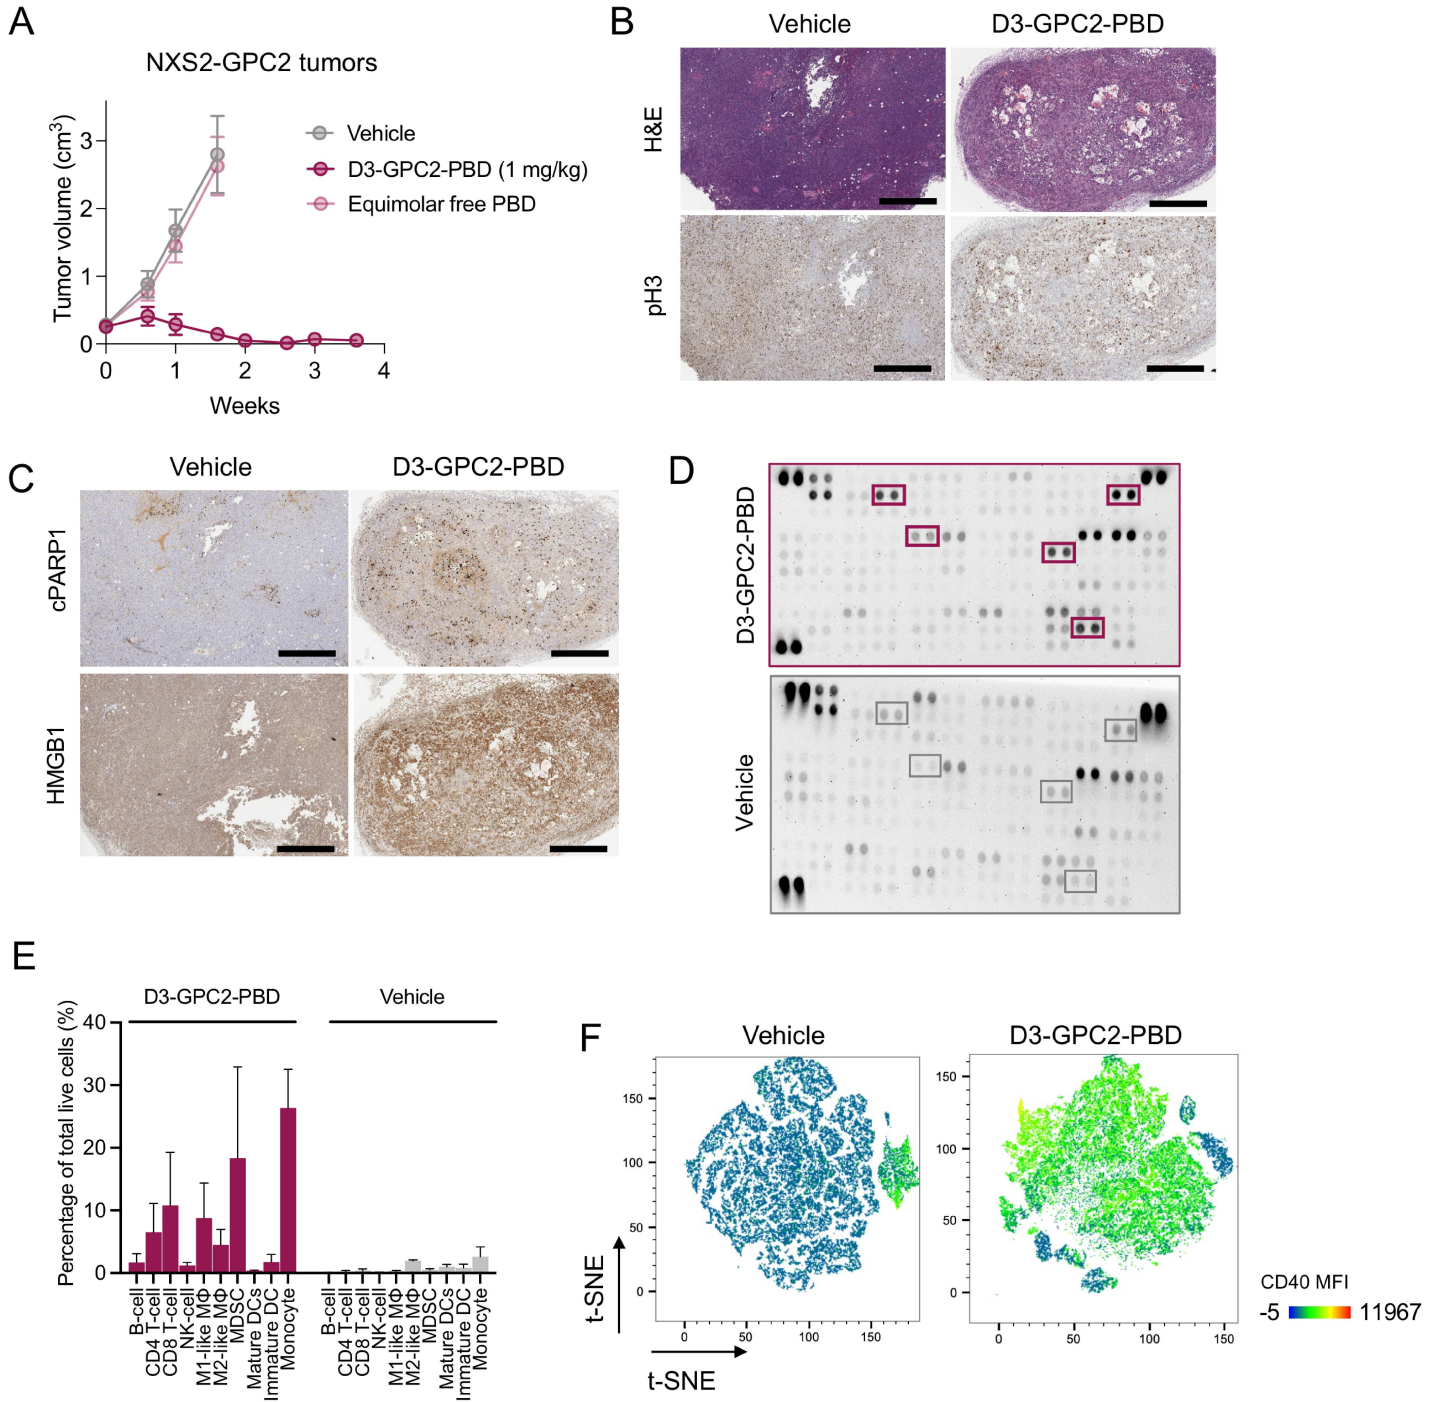

Supplement: jitc-2022-004704supp003_data_supplement.pdf [file jitc-2022-004704supp003_data_supplement.pdf]
